# Supplementary material for: Severe, short-term sleep restriction reduces gut microbiota community richness but does not alter intestinal permeability in healthy young men
Source: PubMed Central journal article supplement (PMC9816096; doi:10.1038/s41598-023-27463-0), 2023-01-05
Supplement: 41598_2023_27463_MOESM1_ESM.pdf [file 41598_2023_27463_MOESM1_ESM.pdf]

## Supplementary Material

### **Severe, short-term sleep restriction reduces gut microbiota community richness but does not alter intestinal permeability in healthy young men**

J. Philip Karl<sup>1\*</sup>, Claire C. Whitney<sup>1</sup>, Marques A. Wilson<sup>1</sup>, Heather S. Fagnant<sup>1</sup>, Patrick N. Radcliffe<sup>1,2</sup>, Nabarun Chakraborty<sup>3</sup>, Ross Campbell<sup>4</sup>, Allison Hoke<sup>3</sup>, Aarti Gautam<sup>3</sup>, Rasha Hammamieh<sup>3</sup> and Tracey J. Smith<sup>1</sup>

<sup>1</sup>*U.S. Army Research Institute of Environmental Medicine, Natick, MA, USA*

<sup>2</sup>*Oak Ridge Institute of Science and Education, Oak Ridge, TN, USA*

<sup>3</sup>*Medical Readiness Systems Biology, CMPN, Walter Reed Army Institute of Research, Silver Spring, MD, USA*

<sup>4</sup>*Geneva Foundation, Walter Reed Army Institute of Research, Silver Spring, MD, USA.*

#### **\*Corresponding author:**

J. Philip Karl  
US Army Research Institute of Environmental Medicine  
Military Nutrition Division  
10 General Greene Ave; Bldg 42  
Natick, MA 01760  
[james.p.karl.civ@health.mil](mailto:james.p.karl.civ@health.mil)  
+01 508-206-2318

## Supplementary Material

**Supplementary Table S1.** Energy and macronutrient intakes and energy balance during three consecutive days of adequate sleep (AS) or sleep restriction (SR).

|                         | <b>AS</b><br><b>(mean ± SD)</b> | <b>SR</b><br><b>(mean ± SD)</b> | <b>Mean difference</b><br><b>[95% CI]</b> | <b>P-value<sup>†</sup></b> |
|-------------------------|---------------------------------|---------------------------------|-------------------------------------------|----------------------------|
| Energy (kcal/d)         | 2762 ± 349                      | 2877 ± 339                      | 115 [67, 164]                             | <0.001                     |
| Carbohydrate (g/d)      | 432 ± 64                        | 459 ± 64                        | 27 [18, 35]                               | <0.001                     |
| Fat (g/d)               | 84 ± 10                         | 85 ± 8                          | 1 [-2, 3]                                 | 0.55                       |
| Protein (g/d)           | 68 ± 6                          | 69 ± 7                          | 1 [-1, 2]                                 | 0.36                       |
| Energy Balance (kcal/d) | 73 ± 131                        | 42 ± 106                        | -31 [-72, 10]                             | 0.12                       |

n = 19.

<sup>†</sup>Paired samples *t*-test.

## Supplementary Material

**Supplementary Table S2.** Morning fasted body weights measured during three consecutive days of adequate sleep (AS) or sleep restriction (SR).

|           | Day 1                   | Day 2                   | Day 3                   | Day 4                   | <i>P</i> -value <sup>†</sup> |      |                   |
|-----------|-------------------------|-------------------------|-------------------------|-------------------------|------------------------------|------|-------------------|
|           |                         |                         |                         |                         | Condition                    | Day  | Condition*<br>Day |
| <b>AS</b> | 77.0 ± 7.2              | 76.9 ± 7.4              | 76.9 ± 7.4              | 76.9 ± 7.5              | <0.001                       | 0.71 | 0.22              |
| <b>SR</b> | 75.9 ± 7.6 <sup>a</sup> | 76.4 ± 7.4 <sup>b</sup> | 76.3 ± 7.3 <sup>b</sup> | 76.4 ± 7.6 <sup>b</sup> |                              |      |                   |

<sup>†</sup>Linear mixed model with condition, day and their interaction as fixed factors and subject as a random intercept.

<sup>a,b</sup>Linear mixed model within condition, including day as a fixed factor and subject as a random intercept. Main effect of day within AS,  $P = 0.84$ . Main effect of day within SR,  $P = 0.02$ . Within a row, values not sharing a superscript letter are significantly different,  $P < 0.05$ .

## Supplementary Material

**Supplementary Table S3.** Serum markers of stress and inflammation following three consecutive nights of adequate sleep (AS) or sleep restriction (SR).

|                                                 | <b>SR-day 1</b> | <b>SR-day 4<sup>†</sup></b> | <b>AS-day 4<sup>‡</sup></b> |
|-------------------------------------------------|-----------------|-----------------------------|-----------------------------|
| Cortisol ( $\mu\text{g/dL}$ ;<br>mean $\pm$ SD) | 16.0 $\pm$ 2.4  | 13.5 $\pm$ 2.8***           | 15.5 $\pm$ 2.1*             |
| hsCRP (mg/L;<br>median [IQR]) <sup>§</sup>      | 0.34 [0.90]     | 0.25 [1.41]                 | 0.39 [1.34]                 |

n = 19.

<sup>†</sup>Within-condition comparisons analyzed by paired *t*-tests. \*\*\*Significantly different from SR-day 1 ( $P < 0.001$ ).

<sup>‡</sup>Between-condition comparisons analyzed by mixed model ANOVA. \*Significantly different from SR-day 4 ( $P = 0.03$ ).

<sup>§</sup>Log<sub>10</sub>-transformed for analysis.

## Supplementary Material

**Supplementary Table S4.** Intestinal permeability measured following three consecutive nights of adequate sleep (AS) or sleep restriction (SR).

|                                                         | AS              | SR              | <i>P</i> -value <sup>†</sup> |
|---------------------------------------------------------|-----------------|-----------------|------------------------------|
| Urine volume (mL;<br>mean $\pm$ SD)                     | 985 $\pm$ 359   | 1063 $\pm$ 249  | 0.53                         |
| Lactulose (%;<br>median [IQR]) <sup>‡</sup>             | 0.08 [0.10]     | 0.10 [0.11]     | 0.77                         |
| Mannitol (%;<br>median [IQR]) <sup>‡</sup>              | 16.3 [6.2]      | 15.6 [5.9]      | 0.47                         |
| Lactulose:mannitol ratio<br>(median [IQR]) <sup>‡</sup> | 0.0047 [0.0056] | 0.0057 [0.0067] | 0.39                         |

n=17.

<sup>†</sup>Mixed model ANOVA.

<sup>‡</sup>Log<sub>10</sub>-transformed for analysis.

## Supplementary Material

**Supplementary Table S5.** Genera and amplicon sequencing variants (ASVs) demonstrating between-condition differences ( $P < 0.05$ ) following two consecutive days of adequate sleep (AS) or sleep restriction (SR).<sup>†</sup>

| Taxon                                                                                 | $\beta \pm SE^{\ddagger}$ | P-value | q-value |
|---------------------------------------------------------------------------------------|---------------------------|---------|---------|
| Genera                                                                                |                           |         |         |
| <i>Campylobacter</i>                                                                  | -0.32 ± 0.10              | 0.007   | 0.29    |
| <i>Roseburia</i>                                                                      | -0.17 ± 0.07              | 0.02    | 0.43    |
| <i>Papillibacter</i>                                                                  | 0.26 ± 0.12               | 0.04    | 0.57    |
| ASV                                                                                   |                           |         |         |
| Firmicutes.Clostridia.Clostridiales.Ruminococcaceae                                   | -0.39 ± 0.10              | 0.001   | 0.20    |
| Firmicutes.Clostridia.Clostridiales.Lachnospiraceae.                                  | -0.34 ± 0.13              | 0.02    | 0.92    |
| Clostridia.Clostridiales.Lachnospiraceae. <i>Clostridium</i>                          | -0.26 ± 0.10              | 0.02    | 0.92    |
| Firmicutes.Clostridia.Clostridiales.Ruminococcaceae. <i>Subdoligranulum variabile</i> | -0.30 ± 0.11              | 0.02    | 0.92    |
| Firmicutes.Clostridia.Clostridiales.Ruminococcaceae                                   | -0.19 ± 0.08              | 0.03    | 0.92    |
| Firmicutes.Clostridia.Clostridiales.Ruminococcaceae                                   | -0.31 ± 0.13              | 0.03    | 0.92    |
| Bacteroidetes.Bacteroidia.Bacteroidales.Bacteroidaceae. <i>Bacteroides</i>            | 0.25 ± 0.11               | 0.03    | 0.92    |
| Bacteroidetes.Bacteroidia.Bacteroidales.Prevotellaceae. <i>Prevotella</i>             | -0.12 ± 0.06              | 0.04    | 0.92    |
| Firmicutes.Clostridia.Clostridiales.Lachnospiraceae. <i>Roseburia inulinivorans</i>   | -0.14 ± 0.07              | 0.05    | 0.92    |

<sup>†</sup>Analyzed by Microbiome Multivariable Associations with Linear Models<sup>1</sup> with treatment, treatment order and study period included as fixed factors, and subject as a random factor.

<sup>‡</sup>AS is the reference group.

<sup>1</sup>Mallick H, Rahnavard A, McIver LJ, et al. Multivariable association discovery in population-scale meta-omics studies. *PLoS Comput Biol.* 2021;17(11):e1009442.

## Supplemental Figure 1

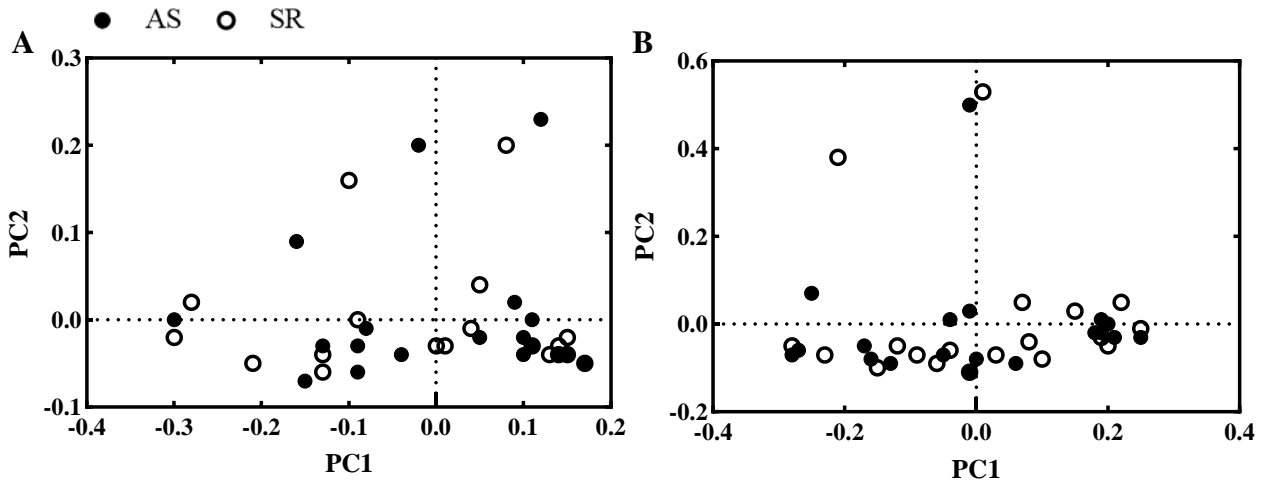

**Supplemental Figure 1. Gut microbiota composition following two consecutive days of adequate sleep (AS) or sleep restriction (SR).** Principal coordinates analysis of (A) weighted and (B) unweighted Unifrac distances. PERMANOVA,  $P = 1.0$ .
